# CCN2/CTGF increases expression of miR-302 microRNAs, which target the TGF $\beta$ type II receptor with implications for nephropathic cell phenotypes

Noel Faherty<sup>1</sup>, Simon P. Curran<sup>1</sup>, Helen O'Donovan<sup>1</sup>, Finian Martin<sup>1</sup>, Catherine Godson<sup>1</sup>, Derek P. Brazil<sup>2</sup> and John K. Crean<sup>1,\*</sup>

<sup>1</sup>UCD Diabetes Research Centre, UCD Conway Institute, University College Dublin, Belfield, Dublin 4, Ireland

<sup>2</sup>School of Medicine, Dentistry and Biomedical Sciences, Queen's University Belfast, University Road, Belfast BT12 6BA, Northern Ireland

\*Author for correspondence ([john.crean@ucd.ie](mailto:john.crean@ucd.ie)).

Accepted 3 August 2012

*Journal of Cell Science* 125, 5621–5629

© 2012. Published by The Company of Biologists Ltd

doi: 10.1242/jcs.105528

## Summary

Signalling interplay between transforming growth factor- $\beta$  (TGF $\beta$ ) and CCN2 [also called connective tissue growth factor (CTGF)] plays a crucial role in the progression of diabetic nephropathy and has been implicated in cellular differentiation. To investigate the potential role of microRNAs (miRNAs) in the mediation of this signalling network, we performed miRNA screening in mesangial cells treated with recombinant human CCN2. Analysis revealed a cohort of 22 miRNAs differentially expressed by twofold or more, including members of the miR-302 family. Target analysis of miRNA to 3'-untranslated regions (3'-UTRs) identified TGF $\beta$  receptor II (T $\beta$ RII) as a potential miR-302 target. In mesangial cells, decreased T $\beta$ RII expression was confirmed in response to CCN2 together with increased expression of miR-302d. T $\beta$ RII was confirmed as an miR-302 target, and inhibition of miR-302d was sufficient to attenuate the effect of CCN2 on T $\beta$ RII. Data from the European Renal cDNA Biopsy Bank revealed decreased T $\beta$ RII in diabetic patients, suggesting pathophysiological significance. In a mouse model of fibrosis (UUO), miR-302d was increased, with decreased T $\beta$ RII expression and aberrant signalling, suggesting relevance in chronic fibrosis. miR-302d decreased TGF $\beta$ -induced epithelial mesenchymal transition (EMT) in renal HKC8 epithelial cells and attenuated TGF $\beta$ -induced mesangial production of fibronectin and thrombospondin. In summary, we demonstrate a new mode of regulation of TGF $\beta$  by CCN2, and conclude that the miR-302 family has a role in regulating growth factor signalling pathways, with implications for nephropathic cell fate transitions.

**Key words:** MicroRNA, Nephropathy, TGF $\beta$ , CCN2/CTGF

## Introduction

Cell fate differentiation is critically important in development and increasingly implicated in numerous disease states. Excessive deposition of extracellular matrix is the common end point of many forms of kidney disease, with myofibroblast cells understood to be principal effectors of matrix accumulation. A predicted source of myofibroblasts is by derivation from resident renal fibroblasts and epithelial cells, in a process known as epithelial to mesenchymal transition (EMT), analogous to developmental cell fate transitions. Transforming growth factor- $\beta$  (TGF $\beta$ ) is known to be involved in the induction of matrix deposition and mesenchymal behaviour of epithelial and fibroblast cell types (Lan, 2003; Yang and Liu, 2001). Significant efforts are focused on the role that TGF $\beta$  and its mediators, including Connective Tissue Growth Factor (CTGF)/CCN2, play during the progression of diabetic nephropathy. In this context, TGF $\beta$  expression is increased (Sharma et al., 1997) and promotes fibrosis (Douthwaite et al., 1999; MacKay et al., 1989); however, it is evident that it also has a complex pleiotropic role. Increased expression of CCN2 is a confounding feature of the microenvironment that modulates responses in the mesangium during the initiation and progression of disease (Riser et al., 2000; Wahab et al., 2001). The nature of its structural organisation has led to the emerging view that CCN2 functions as a matricellular regulator (for reviews, see Brigstock,

2010; Holbourn et al., 2008; Shi-Wen et al., 2008). A better understanding of the consequences of TGF $\beta$  signalling in this CCN2-rich microenvironment would represent a significant advance in our understanding of the patho-mechanisms of nephropathy. A modulatory effect of CCN2 on TGF $\beta$  superfamily signalling has been defined in various contexts including embryonic development (Abreu et al., 2002; Shi-wen et al., 2006), skin fibrosis (Mori et al., 1999; Nakerakanti et al., 2011), diabetic nephropathy (Nguyen et al., 2008) and mesangial cell dysfunction (O'Donovan et al., 2012); while coordinate expression of TGF $\beta$  and CCN2 has been demonstrated in glomerulonephritis and diabetic nephropathy (Ito et al., 2010). Studies have also highlighted the cooperative nature of CCN2 and TGF $\beta$  in the promotion of fibrosis in animal models (Wang et al., 2011). In the kidney, several microRNAs (miRNAs) are preferentially expressed, with increasing appreciation of a role for miRNAs in nephropathy (Kato et al., 2007; Wang et al., 2008). In some contexts, modulation by miRNAs of CCN2 expression has been investigated, but to date no data exists on CCN2 mediated miRNA expression in any disorder. We demonstrate a mode of regulation of TGF $\beta$  signalling by CCN2 through increased expression of the miR-302 cluster. We show that members of this microRNA family induced by CCN2 can negatively regulate expression of TGF $\beta$  receptor II (T $\beta$ RII), with resulting alteration in

the balance of signalling pathways activated *in vitro*. We use a miR-302 mimic to abrogate *in vitro* development of EMT and present evidence for re-capitulation of key *in vitro* findings *in vivo*.

## Results and Discussion

### CCN2 induces microRNAs targeting the TGF $\beta$ type II receptor (T $\beta$ RII)

We investigated miRNA expression in primary human mesangial cells (HMCs) treated with recombinant human CCN2 (rhCCN2) using a Taqman low density array. To confirm the biological activity of the rhCCN2 used, HMCs were first treated with the growth factor for a short timecourse and increased extracellular-signal-regulated kinase (ERK) and P38 phosphorylation was found, confirming functional activity (supplementary material Fig. S1). A cohort of miRNAs differentially expressed in response to CCN2 was determined (Fig. 1) and analysed. Pathway analysis of predicted miRNA targets identified signalling networks (supplementary material Table S1) including TGF $\beta$  signalling, MAP kinase signalling and extracellular matrix-receptor interactions. Increased expression of three members of the same miRNA family (miR-302b/c/d) was noted and target analysis suggested T $\beta$ RII as a miR-302 target; T $\beta$ RII expression was determined in HMCs treated with rhCCN2 and decreased T $\beta$ RII mRNA was confirmed concomitant with increased miR-302d expression (Fig. 2A,B). Changes in miR-302d expression in response to rhCCN2 exhibited a dose and time dependent response, persistent to 48 hours (supplementary material Fig. S2) and changes in T $\beta$ RII in response to rhCCN2 persisted to 96 hours (Fig. 2C). Transfection of full length CCN2 also increased miR-302d and decreased T $\beta$ RII (Fig. 2D,E). Alignment of the 3'UTR of the TGFBR2 gene with miR-302s illustrated potential seed regions for microRNA binding (not shown). To determine if TGFBR2 was a true miR-302 target, we co-transfected a TGFBR2 3'UTR luciferase construct into HEK-293T cells with silencing (Anti-miR) or native miR-302d oligos (Pro-miR) (Fig. 2F). The effect of rhCCN2 on luciferase activity was also determined. Consistent with TGFBR2 being a miR-302d target, inhibition of the microRNA or introduction of a mimic altered luciferase activity, but the effect was modest. The experiment was repeated in more readily transfectable HeLa cells with similarly robust alterations in luciferase activity observed (supplementary material Fig. S3). rhCCN2 was sufficient to decrease luciferase activity in both cell lines, demonstrating regulation of T $\beta$ RII expression via miR-302. In HMCs, Pro-miR or Anti-miR was sufficient to alter miR-302d levels (Fig. 2G) and consequently moderate the effect of rhCCN2 on T $\beta$ RII (Fig. 2H,I).

### Modulation of miR-302 results in altered signalling responses

Increased TGF $\beta$  expression has been linked to increased extracellular matrix production and fibrosis in diabetic nephropathy (Wu and Derynck, 2009; Ziyadeh, 2004). TGF $\beta$  signalling via specific serine/threonine kinase receptors and Smad effectors is well established, but it is also accepted that the proteomic composition of a cell influences the response to TGF $\beta$  signalling (Massagué and Chen, 2000). 'Context-dependent' events control not only canonical Smad2/3-dependent pathway responses but also the activation of Smad2/3-independent pathways regulating additional TGF $\beta$  responses (Derynck and Zhang, 2003). We next investigated CCN2/miR-302d as a context dependent regulator of signalling responses. Canonical TGF $\beta$  signalling requires binding of the ligand to T $\beta$ RII, dimerisation of T $\beta$ RII and T $\beta$ RI, cross phosphorylation, and Smad2/3 recruitment (Massagué and Chen, 2000). Our observation of decreased T $\beta$ RII expression suggested pathways independent of T $\beta$ RII. We have previously described a shift in TGF $\beta$  signalling in the presence of CCN2, where canonical Smad based signalling is repressed by CCN2 and there is a resulting increase in non-canonical MAP kinase based signalling (O'Donovan et al., 2012). To evaluate the importance of CCN2 driven expression of miR-302s in this context, we manipulated miR-302d levels. Introduction of Pro-miR was sufficient to decrease T $\beta$ RII levels and partially attenuate Smad3 activation (Fig. 2J, quantified in supplementary material Fig. S4), evidence for functional significance of miR-302 in regulation of TGF $\beta$  signalling. Conversely, transfection of Anti-miR was not associated with changes in canonical TGF $\beta$  signalling (Fig. 2K, quantified in supplementary material Fig. S4). We then transfected CCN2 and Pro-miR into HEK-293T cells expressing a Smad binding element (SBE) secreted alkaline phosphatase reporter (SEAP). Overexpression of CCN2 was sufficient to increase miR-302d levels, decrease T $\beta$ RII and decrease TGF $\beta$ -induced SBE activity (Fig. 2L). Similarly transfection of Pro-miR resulted in decreased T $\beta$ RII and SBE activity (Fig. 2M), demonstrating functional relevance of CCN2/miR-302 for SBE containing TGF $\beta$  target genes.

### miR-302d is increased in UO, concomitant with decreased T $\beta$ RII and altered signalling responses

Data from the European Renal cDNA Biopsy Bank (Schmid et al., 2006) shows a decrease in T $\beta$ RII in diabetic nephropathy patients versus controls (not shown), suggesting pathophysiological relevance of decreased T $\beta$ RII expression. To evaluate a potential

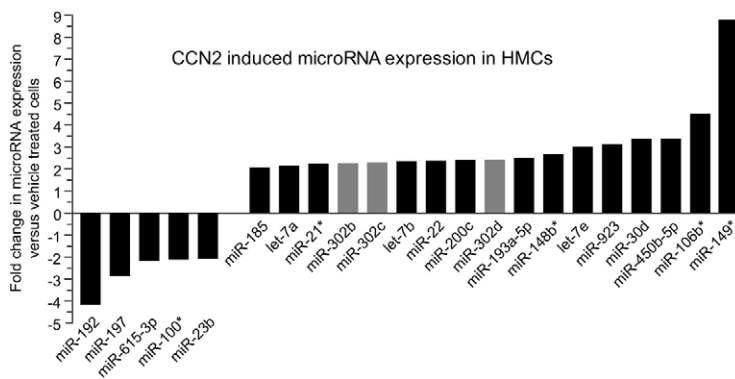

**Fig. 1. CCN2 induces differential miRNA expression in HMCs.**

Primary HMCs were treated with rhCCN2 or vehicle for 24 hours and RNA containing the small RNA fraction was isolated. A TaqMan low-density array determined 22 miRNAs that were differentially expressed by twofold or more in response to rhCCN2. Three members of the miR-302 family showed an increase in expression (grey bars). Data represent the change in miRNA expression in a pooled sample from three biological replicates per condition. MicroRNAs with an asterisk are 'star' variants from the non-dominant arm of the miRNA duplex, which are often not integrated into the RNA induced silencing complex.

role for miR-302/T $\beta$ RII in renal fibrosis we examined a 10 day unilateral ureteral obstruction (UUO) model. UUO induces pathogenic markers of kidney fibrosis including interstitial myofibroblast accumulation, matrix accumulation and tubular

atrophy. Seed regions between mouse miR-302 family members and the orthologous mouse TGFBR2 gene were found by alignment (not shown). We measured miR-302d in renal tissue from sham operated and ligated mice, and contralateral kidneys.

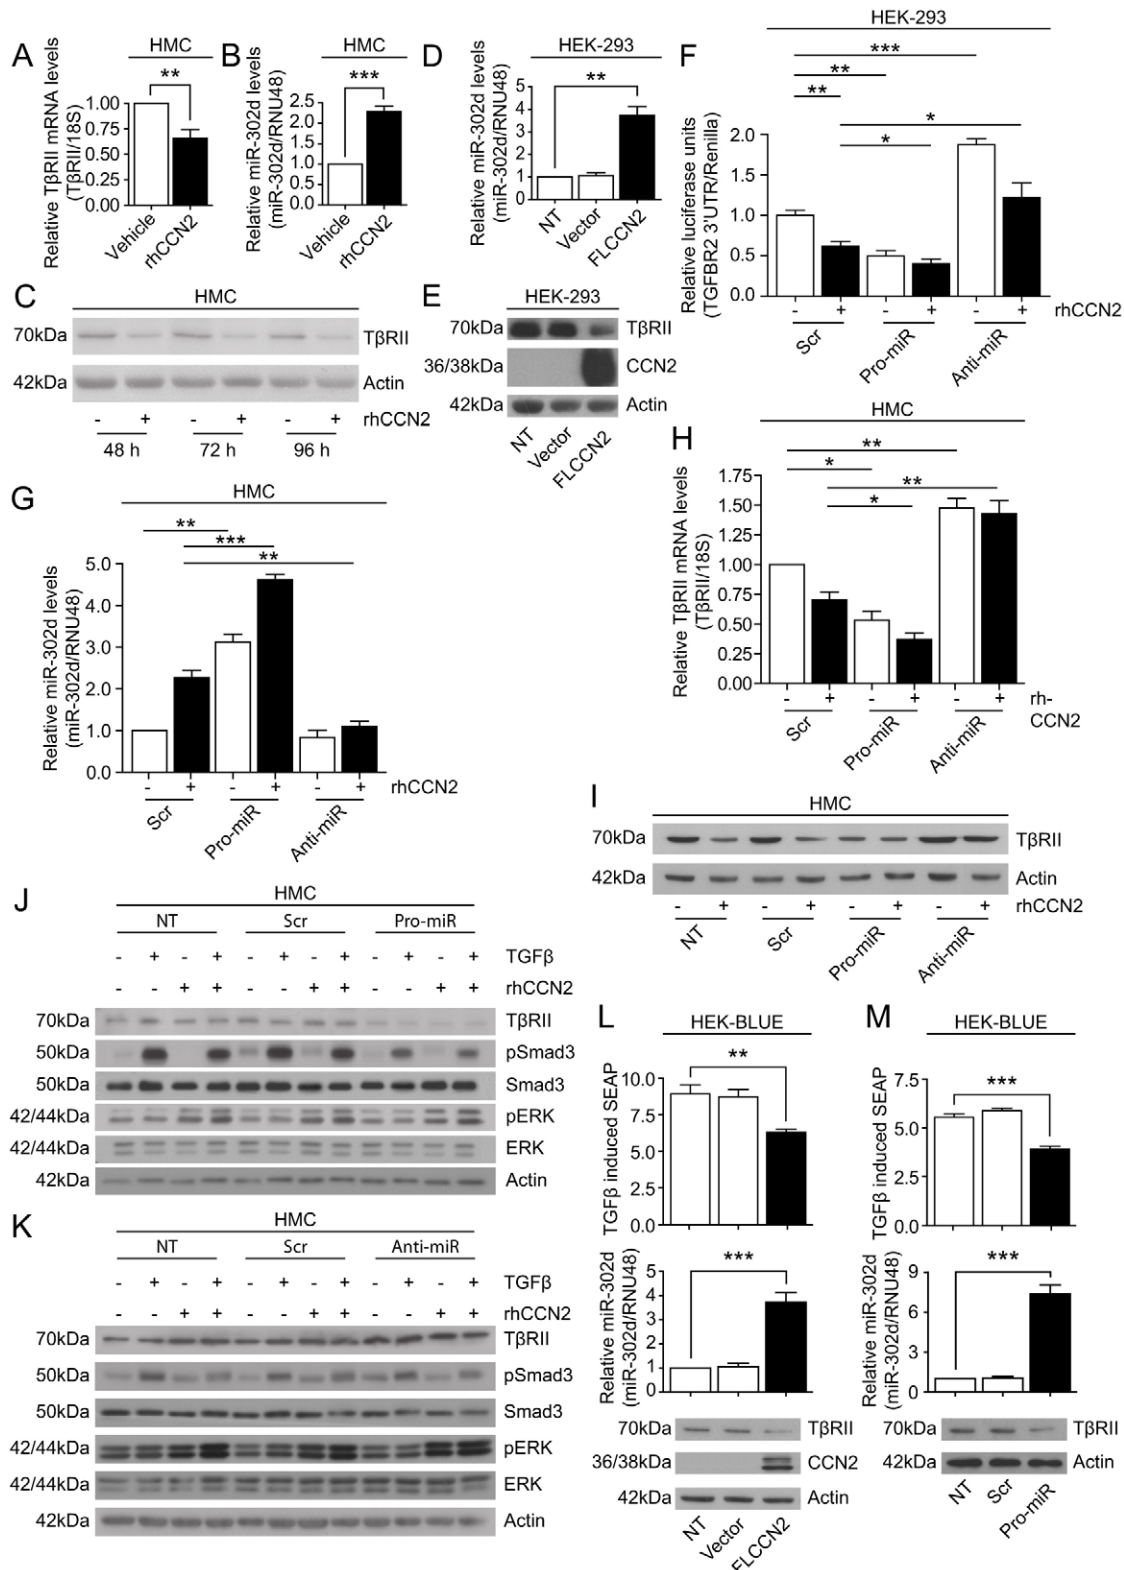

Fig. 2. See next page for legend.

Increased deposition of collagens and interstitial matrix protein was confirmed histologically in ligated kidneys by Picosirius Red and Masson's Trichrome (Fig. 3A, quantified in supplementary material Fig. S5A,B) in addition to increased fibronectin (FN-1) and thrombospondin 1 (TSP1), markers of fibrotic damage (Fig. 3B, quantified in supplementary material Fig. S5C,D). TGF $\beta$  mRNA and protein levels were found to be increased in ligated kidneys samples, indicating normal fibrotic pathophysiology (Fig. 3C), while miR-302d levels were also found to be increased in ligated kidney versus sham controls (Fig. 3D). Following on this observation, we examined expression of T $\beta$ R $\beta$ II and major signalling components (Fig. 3E–G, quantified in supplementary material Fig. S5E–I) and carried out additional quantification of tubulin levels to confirm equal loading of protein (supplementary material Fig. S6). Consistent with increased expression of miR-302d, increased CCN2 and decreased T $\beta$ R $\beta$ II was observed in ligated kidneys versus both non-ligated and sham operated controls. Canonical TGF $\beta$  effectors Smads 2 and 3 illustrated an apparent dichotomy; while both Smad2 and Smad3 were increased in ligated kidneys, only Smad3 was phosphorylated. Smad2 phosphorylation was decreased in ligated versus control, indicating that while increases in Smad2 are present, activation is attenuated. Noting the decreased expression of T $\beta$ R $\beta$ II in UUO, we proceeded to delineate a role for receptor II independent and non-canonical signalling in the induction of fibrosis. Cells were with a kinase dead T $\beta$ R $\beta$ II construct (T $\beta$ R $\beta$ II

K227R) and examined expression of fibronectin, thrombospondin and signalling mediators in response to TGF $\beta$ . While transfection of K227R was sufficient to abolish Smad phosphorylation, increased expression of fibronectin and thrombospondin still occurred, in addition to an apparent compensatory increase in ERK activation (Fig. 3H, left) To determine the functional importance of CCN2/ERK regulation of fibronectin and thrombospondin in this Smad-depleted system, we pre-treated T $\beta$ R $\beta$ II K227R transfected cells with PD-98059 (a MEK inhibitor) or FG-3019 (a polyclonal antibody directed against CCN2) prior to TGF $\beta$  stimulation (Fig. 3H, right). PD-98059 was sufficient to partially attenuate TGF $\beta$  induced fibronectin and thrombospondin, this effect was more marked upon pre-transfection with K227R. Similarly, FG-3019 was sufficient to attenuate fibronectin induction in K227R transfected cells.

### miR-302d can regulate TGF $\beta$ induced EMT and blunt mesenchymal phenotype via T $\beta$ R $\beta$ II inhibition

Members of the miR-302 family have been primarily associated with embryonic cell differentiation (Lin et al., 2010), and a recent study has demonstrated a role for miR-302 family members in the re-programming of human fibroblasts to pluripotent stem cells (Subramanyam et al., 2011). Differentiation of embryonic stem cells requires discreet changes including loss of E-cadherin, increased vimentin, *de novo* smooth muscle actin synthesis and increased gelatinase activity (Eastham et al., 2007; Rubio et al., 2008). Evidence of cellular plasticity, characterised as epithelial to mesenchymal transition (EMT) has been described in *in vitro* models of renal fibrosis (Iwano et al., 2002; Okada et al., 2001) and *in vivo* (Rastaldi et al., 2002). We examined the effect of miR-302 on renal cells in this context by transfecting miR-302d into tubular epithelial and glomerular mesangial cells, and determined expression of classical markers of plasticity and fibrosis in response to TGF $\beta$ . In HMCs TGF $\beta$  induced fibronectin and thrombospondin was attenuated by pre-transfection with Pro-miR (Fig. 4A, quantified in supplementary material Fig. S7A). To determine whether this effect was modulated by negative regulation of T $\beta$ R $\beta$ II, we transfected cells with a vector encoding wild-type T $\beta$ R $\beta$ II (WT T $\beta$ R $\beta$ II) with or without Pro-miR, and treated with TGF $\beta$ . Pro-miR transfection was sufficient to sustain increased miR-302d levels in HEK-293 cells (Fig. 4B) and the attenuation of fibronectin and thrombospondin by miR-302d was reversed by WT T $\beta$ R $\beta$ II (Fig. 4C, quantified in supplementary material Fig. S7B). In HKC8 tubular epithelial cells transfection of CCN2 resulted in increased miR-302d levels (Fig. 4D) and decreased T $\beta$ R $\beta$ II expression (Fig. 4E), demonstrating consistent CCN2 regulation of miR-302/T $\beta$ R $\beta$ II between mesangial and epithelial cells. Transfection of Pro-miR resulted in sustained miR-302d levels (Fig. 4F) and we investigated the effect of miR-302 on TGF $\beta$  induced EMT. Pro-miR attenuated TGF $\beta$  induced vimentin and N-cadherin, while restoring levels of E-cadherin and ZO-1 (Fig. 2G, quantified in supplementary material Fig. S7C). Transfection of WT T $\beta$ R $\beta$ II was sufficient to reverse this effect. Transfection of Pro-miR also abrogated TGF $\beta$  induced vimentin reorganisation and loss of junctional ZO-1 expression in HKC8 cells (supplementary material Fig. S8). Relevance for CCN2 induced miR-302 as a negative regulator of EMT was confirmed where transfection of native CCN2 into epithelial cells was sufficient to attenuate TGF $\beta$  induced vimentin and reduced E-cadherin (supplementary material Fig. S9).

**Fig. 2. T $\beta$ R $\beta$ II is validated as an miR-302 target and is decreased by CCN2-induced miR-302, with implications for signalling and transcriptional responses.** (A,B) Treatment of HMCs with rhCCN2 (25 ng/ml) results in decreased T $\beta$ R $\beta$ II mRNA expression concomitant with increased expression of miR-302d. (C) Treatment of HMCs with rhCCN2 resulted in sustained decreased expression of T $\beta$ R $\beta$ II to 96 hours. (D,E) The effect of endogenously produced CCN2 was confirmed when transfection of FLCCN2 into HEK-293 cells increased miR-302d levels and decreased T $\beta$ R $\beta$ II. (F) HEK-293 cells were transfected with *TGFBR2* 3'-UTR and *Renilla* luciferase-containing construct for 24 hours and treated with rhCCN2. Co-transfection with pro-miR-302d (Pro-miR) decreased 3'-UTR luciferase activity, whereas transfection with anti-miR-302d (Anti-miR) increased luciferase activity, confirming *TGFBR2*/T $\beta$ R $\beta$ II as an miR-302 target. Treatment of transfected cells with rhCCN2 was simultaneously sufficient to decrease luciferase activity, demonstrating that CCN2 can negatively regulate T $\beta$ R $\beta$ II through miR-302. Data represent means  $\pm$  s.e.m. of  $n=3$  experiments. (G,H) Transfection of HMCs with Pro-miR and Anti-miR was sufficient to alter miR-302d levels, with inverse changes in T $\beta$ R $\beta$ II mRNA levels. The effect of rhCCN2 on miR-302d and T $\beta$ R $\beta$ II mRNA was attenuated by Anti-miR, confirming the regulatory mechanism of CCN2. (I) Anti-miR was sufficient to reverse the effects of rhCCN2 on T $\beta$ R $\beta$ II protein, whereas Pro-miR further dampened T $\beta$ R $\beta$ II production in HMCs treated with rhCCN2. (J) TGF $\beta$  (10 ng/ml) and CCN2 co-treatment of HMCs results in dampened Smad3 activation, whereas non-canonical ERK signalling is increased. Transfection of cells with Pro-miR ablated the ability of TGF $\beta$  to activate canonical signalling but did not alter other signalling responses. (K) Conversely, transfection of HMCs with Anti-miR did not alter Smad or ERK activation. (L,M) Transfection of FLCCN2 or Pro-miR results in negative Smad2/3 transcriptional activity by SBE-dependent secreted alkaline phosphatase activity, where FLCCN2 increased miR-302d and decreased T $\beta$ R $\beta$ II in HEK-Blue reporter cells and Pro-miR similarly decreased transcriptional response. All real-time qRT-PCR data represent means  $\pm$  s.e.m. of  $n=3$  experiments with 3 replicates per experiment. All blots are representative of  $n=3$  experiments. \* $P<0.05$ , \*\* $P<0.01$ , \*\*\* $P<0.001$ . Abbreviations: NT, non-transfected control; Scr, scrambled oligo control; SEAP, secreted alkaline phosphatase.

### Regulation of adult cell signalling by miR-302

To date the miR-302 family have been reported to have roles in the regulation of embryonic cell differentiation and as potential tumour biomarkers (Lin et al., 2010; Murray et al., 2011). MiR-302 miRNAs share homology with miR-430 family members, which have known TGF $\beta$  signalling targets (Rosa et al., 2009). Here we report that in adult mesenchymal cells, members of the miR-302 family induced by CCN2 can negatively regulate

expression of the type II TGF $\beta$  receptor with implicit implications for the activation of canonical signalling and downstream transcription by TGF $\beta$ , findings in line with those reported by others – Subramanyam and colleagues found that promotion of miR-302 was sufficient to dampen T $\beta$ R $\beta$ II and Smad2/3 activation (Subramanyam et al., 2011) while Lipchina and colleagues demonstrated that miR-302/367 decreased BMP-Id1 transcription and Lefty1/2 expression – distant members of

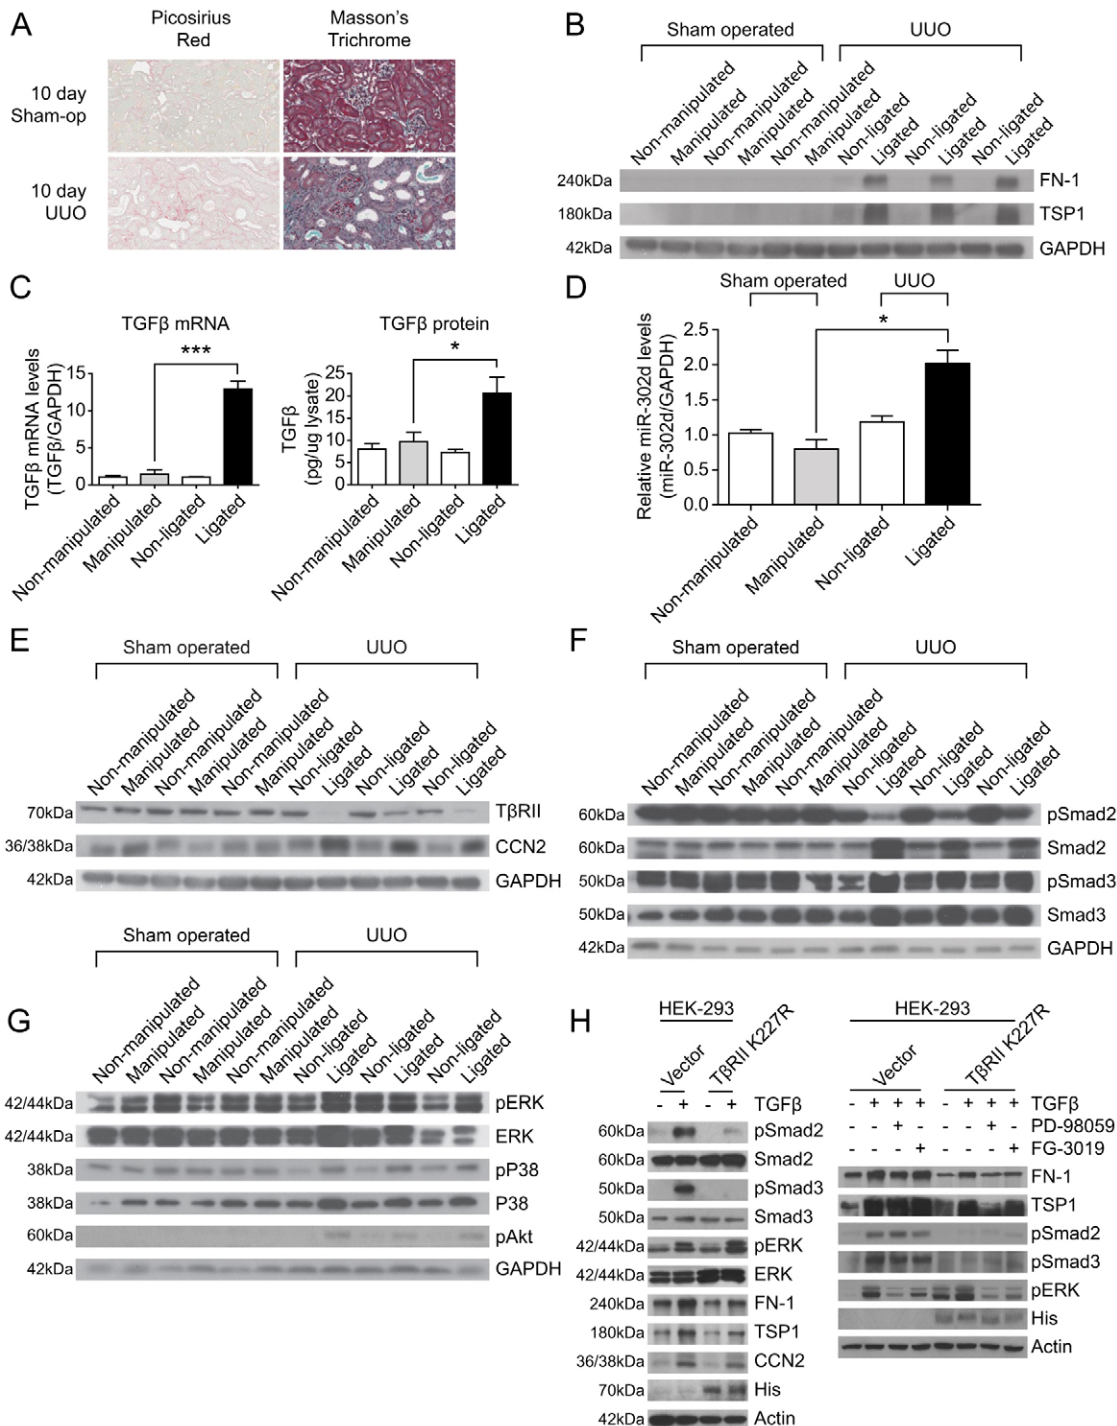

Fig. 3. See next page for legend.

the TGF $\beta$  superfamily (Lipchina et al., 2011). Similarly, regulation by miR-302/427/430 families of Lefty1/2 in mesodermal fate specification has been described (Rosa et al., 2009); the data presented here shows that regulation of TGF $\beta$  signalling by members of the miR-302 family is not confined to embryonic stem cell behaviour/differentiation, but also regulates behaviour in adult cells with pathogenic significance.

### Decreased T $\beta$ RII and divergent signalling in the UO mouse

We report that in a chronic model of tubulointerstitial fibrosis, expression of CCN2 and miR-302 is increased while T $\beta$ RII expression is decreased in parallel with divergent Smad activation. This interesting finding lends support to a hypothesis of differential roles for Smad2 and Smad3 in the regulation of profibrotic responses. Specific gene responses have been found to be dependent on either Smad2 or Smad3 (Phanish et al., 2006), and multiple studies have demonstrated that deletion of Smad3 attenuates fibrosis (Roberts et al., 2006; Sato et al., 2003) while the same does not apply for Smad2 (Yang et al., 2010). Further, a recent study by Meng and colleagues demonstrated a protective role for Smad2 in UO, deletion being associated with greater fibrosis by enhanced Smad3 phosphorylation and auto-induction of TGF $\beta$ , while overexpression attenuated Smad3 phosphorylation and collagen I (Meng et al., 2010). More recently again, a study by the same authors evaluated disruption of T $\beta$ RII in UO. This resulted in incomplete attenuation of collagen I,  $\alpha$ -smooth muscle

actin and fibronectin production, but was associated with an enhanced inflammatory response (Meng et al., 2012). Increased expression of TGF $\beta$  receptor I and II mRNA has been reported in UO (Liu et al., 2011; Sutaria et al., 1998) but these findings do not preclude receptor turnover or degradation by microRNAs including miR-302s. As described above (Fig. 3C), we measured increased expression of TGF $\beta$  in UO; however, a number of studies have shown that TGF $\beta$  negatively regulates the expression of T $\beta$ RII (Meng et al., 2011; Truty et al., 2009) so it seems possible that a similar mechanism is found in the UO mouse. We propose that this represents a negative regulatory loop in TGF $\beta$  signalling. It is clear that many different mechanisms independent of TGF $\beta$  exist by which ERK, p38 and Akt can be regulated in fibrosis; these likely include a role for TGF $\beta$ /CCN2/miR-302 negative feedback impeding canonical signalling. It has previously been reported that CCN2 can regulate pathological features of fibrosis via ERK (Chen et al., 2004; Ding et al., 2011; Fuchshofer et al., 2011) and recently in UO, inhibition of CCN2 with a FG-3019 has lessened collagen deposition and fibrosis severity (Wang et al., 2011). Specific inhibition of CCN2 and MEK/ERK demonstrated that a switch in signalling mediator occurs from Smad dependent to Smad independent in the presence of the kinase dead T $\beta$ RII. Paralleling this switch we observed continued increased expression of fibronectin and thrombospondin; in the absence of Smad signalling fibrotic responses persist, supporting the findings of Pannu and colleagues in dermal fibroblasts (Pannu et al., 2007). These findings strengthen the hypothesis that CCN2/ERK can regulate the fibrotic response. Intriguingly a recent study has demonstrated exacerbated aortic growth in the presence of ablated Smad signalling in a model of Marfan's syndrome, defining a critical role for non-canonical TGF $\beta$  signalling in a disease context (Holm et al., 2011).

### miR-302/CCN2 as regulators of EMT

Subramanyam and colleagues have recently demonstrated in HaCat cells that miR-302b inhibited TGF $\beta$  induced EMT by way of restoring E-cadherin and ZO-1 expression (Subramanyam et al., 2011). A further recent study by Lipchina and colleagues demonstrated in addition to targeting TGF $\beta$  signalling, miR-302 promoted BMP signalling by targeting BMP inhibitors TOB2, DAZAP2 and SLAIN1 in human embryonic stem cells, with the effect of maintaining pluripotency (Lipchina et al., 2011). In this study, we found that miR-302 could attenuate induction of selective markers of fibrosis by TGF $\beta$ , an effect which was dependent on inhibition of T $\beta$ RII. Taken together, it is apparent that miR-302 can regulate developmental EMT and the data shown here suggests similar function in disease associated EMT. Notwithstanding current controversies surrounding the role of EMT in renal fibrosis, a consensus is slowly emerging that concedes a partial differentiation of epithelial cells in tubulointerstitial fibrosis that may be characterised by intermediate phenotypical changes (Kalluri and Weinberg, 2009; Zeisberg and Neilson, 2010), although it remains to be proven if 'partial-EMT' is recapitulated in renal fibrosis (Kriz et al., 2011; Zeisberg and Duffield, 2010). Pathologically, the most salient feature of nephropathy is glomerular and tubular hypertrophy. The complexities of TGF $\beta$  signalling in this microenvironment are slowly emerging – in this context it is possible that CCN2 induced miR-302 regulates epithelial cell differentiation and hypertrophy. Burns and colleagues have previously reported that CCN2 induced a dose dependent change in cell morphology, with significantly

**Fig. 3. Increased expression of miR-302d is found in 10-day-ligated UO mouse kidney tissue with prevalence of canonical and non-canonical TGF $\beta$  signalling; *in vitro* use of kinase-dead T $\beta$ RII demonstrates T $\beta$ RII-independent induction of fibrotic markers and impetus upon CCN2/ERK induction.** (A) Increased deposition of collagen was confirmed by Picrosirius Red staining of kidney sections and increased connective tissue deposition was evidence by Masson's Trichrome staining, confirming induction of kidney fibrosis. (B) Increased induction of fibronectin (FN-1) and thrombospondin 1 (TSP1) production was confirmed in the ligated kidney. (C) Real-time PCR analysis revealed increased TGF $\beta$  mRNA in mouse RNA samples from ligated kidneys (left; data represent means  $\pm$  s.e.m. from  $n=4$  animals), whereas TGF $\beta$  protein was assessed by ELISA and found to be increased in the ligated kidneys (right; data represent means  $\pm$  s.e.m. for  $n=4$  animals). (D) Real-time PCR analysis found increased miR-302d levels in the ligated kidneys, as a proxy readout for miR-302 activity. Data represent means  $\pm$  s.e.m. for  $n=4$  animals. (E) The expression of T $\beta$ RII and CCN2 was determined and found to be decreased and increased (respectively) in the ligated kidneys, suggesting potential recapitulation of *in vitro* observations from HMCs. (F) Evaluation of canonical signalling of Smad2/3 found divergent phosphorylation of Smad2 and Smad3, with only Smad3 phosphorylation being increased. (G) Increased non-canonical signalling induction in the form of increased ERK, p38 and Akt phosphorylation was also observed. (H) To further examine the importance of T $\beta$ RII in the induction of fibrosis a kinase-dead dominant-negative T $\beta$ RII construct (T $\beta$ RII K227R) was transfected into HEK-293 cells (left panel). Induction of fibronectin and thrombospondin by TGF $\beta$  still occurred in the presence of the T $\beta$ RII K227R; simultaneously, a compensatory increase in ERK activation and production was observed. To dissect the importance of CCN2/ERK in this effect, T $\beta$ RII K227R-transfected cells were pre-treated with either the MEK inhibitor PD-98059 (10  $\mu$ M) or a monoclonal antibody to CCN2 FG-3019 (10  $\mu$ g/ml) prior to TGF $\beta$  treatment (right panel). Both the MEK inhibitor and the antibody to CCN2 were sufficient to further attenuate fibronectin production in the presence of T $\beta$ RII K227R, demonstrating a role for CCN2/ERK in regulation of fibrotic markers in the absence of T $\beta$ RII. All blots for kidney tissue expression are from  $n=3$  animals from both groups; all other blots are representative of  $n=3$  experiments *in vitro*. \* $P<0.05$ , \*\*\* $P<0.001$ . op, operated.

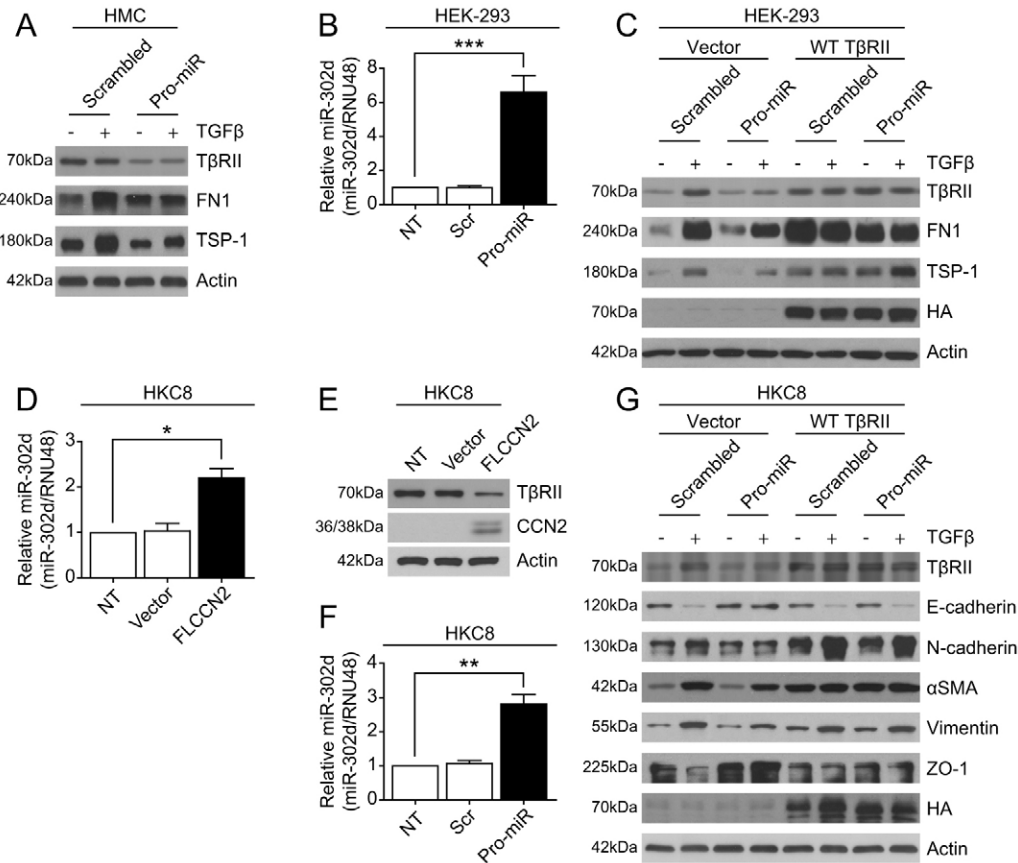

**Fig. 4.** miR-302d reverses TGF $\beta$ -induced expression of markers of fibrosis in HMCs and inhibits EMT in renal epithelial cells, an effect that can be reversed by overexpression of T $\beta$ RII. (A) In HMCs, pre-transfection of cells with pro-miR-302d (Pro-miR) attenuated TGF $\beta$  (10 ng/ml)-induced expression of fibronectin (FN-1) and thrombospondin (TSP-1). (B) Transfection of Pro-miR into HEK-293 cells results in sustained miR-302d levels. (C) Pro-miR was then co-transfected into HEK-293 cells with a wild-type T $\beta$ RII construct (WT T $\beta$ RII). WT T $\beta$ RII was sufficient to increase FN1 and TSP-1 basal levels but did not significantly enhance their response to TGF $\beta$  compared with vector co-transfected control. The role of CCN2/miR-302 on TGF $\beta$ -induced EMT in renal cells was then examined. (D) Transfection of FLCCN2 into HKC8 cells was sufficient to increase miR-302d levels; (F) similarly, transfection of Pro-miR resulted in sustained miR-302d levels and (E) transfection of cells with FLCCN2 decreased T $\beta$ RII levels. (G) Pro-miR and WT T $\beta$ RII were transfected into epithelial cells and the EMT responses to TGF $\beta$  examined. Pro-miR restored E-cadherin and ZO-1 levels reduced by TGF $\beta$ , partially attenuated  $\alpha$ -smooth muscle actin ( $\alpha$ SMA) and vimentin induction and attenuated N-cadherin production. The effect of miR-302 on  $\alpha$ SMA, ZO-1 and N-cadherin was substantially reversed by transfecting in WT T $\beta$ RII. All real-time qRT-PCR data represent means  $\pm$  s.e.m. of  $n=3$  experiments with three replicates per experiment. All blots are representative of  $n=3$  experiments. \* $P<0.05$ , \*\* $P<0.01$ , \*\*\* $P<0.001$ . Abbreviations: NT, non-transfected control, Scr, scrambled oligo control.

different characteristics to that of TGF $\beta$ -induced EMT (Burns et al., 2006). The authors found that instead of reducing E-cadherin expression, CCN2 induced a peri-nuclear redistribution of the normally junctional protein. In this study, the divergent regulatory effect of CCN2 on E-cadherin/vimentin/ $\alpha$ -smooth muscle actin supports a hypothesis where CCN2 functions as a 'partial-EMT' mediator.

Recent findings from Fragiadaki and colleagues demonstrated that CCN2 in itself is not sufficient to promote fibrosis (Fragiadaki et al., 2011). This observation, along with other studies has strengthened the view that CCN2 functions as a co-ordinator of other profibrotic factors including TGF $\beta$ . MicroRNAs have significant promise as novel therapeutics, for example antagonists have been shown to successfully target microRNA in the kidneys (Krützfeldt et al., 2005). The observation that miR-302 is sufficient to attenuate expression of markers associated with fibrosis in a myofibroblast cell and stabilise epithelial phenotype suggests that manipulating the expression of miR-302 in the context of renal fibrosis may confer therapeutic benefit.

## Materials and Methods

### Animals and histology

Procedures were licensed by the Irish Department of Health and approved by the UCD Animal Research Ethics Committee. Male C57Bl/6J mice aged 10–12 weeks were placed in two groups: UUO and sham-operated. Animals in the UUO group were anaesthetised, received midline laparotomy; the left ureter was located and ligated. Animals in the sham group had the left ureter exposed and manipulated. On day 10, mice were harvested, UUO was confirmed by dilation of the renal pelvis, and the renal capsule was removed and tissue sections snap frozen. Paraffin embedded sections (5  $\mu$ m) were stained with Picosirius Red and Masson's Trichrome and scored blindly from 1–5 with 1 representing collagen deposition or matrix distribution and 5 representing 5 fold or more collagen accumulation and >75% of the cortex having more matrix distribution than normal.

### Tissue culture

Primary human mesangial cells (Lonza, Basel, Switzerland) were cultured in MCDB-131 media supplemented with 10% fetal bovine serum (FBS), 100 units/ml penicillin/1 mg/ml streptomycin and 2 mM L-glutamine (all from Invitrogen, Paisley, UK). HEK-293T/17, HKC8 proximal tubular epithelial cells and HeLa cells (all from American Type Culture Collection) were cultured in DMEM (Lonza) supplemented with 10% FBS, penicillin/streptomycin and L-glutamine. HEK-Blue TGF $\beta$  cells (Invivogen, Toulouse, France) were cultured in DMEM supplemented with 4.5 g/L D-glucose, 10% FBS, penicillin/streptomycin, L-glutamine, 30  $\mu$ g/ml Blasticidin, 200  $\mu$ g/ml Hygromycin and 100  $\mu$ g/ml Zeocin

(selective antibodies from Invivogen). Cultures were maintained at 37°C in an environment of 5% CO<sub>2</sub>/95% air, and were serum restricted (0.2% FBS) for 24 hours prior to all stimulations. Cells were treated with 10 ng/ml TGFβ1 (Promokine, Heidelberg, Germany), 25 ng/ml rhCCN2 (Fibrogen Inc., South San Francisco, CA) or both together, for 24 hours to determine miRNA expression changes, 48/72/96 hours to determine changes in TβRII, 24 hours for EMT/fibrotic marker expression and 30/180 minutes to determine changes in TGFβ signalling. MEK/ERK activity was inhibited by adding PD-98059 (Merck, Whitehouse Station, NJ) at 10 μM for 1 hour prior to treatment with TGFβ. TGFβ-induced CCN2 activity was inhibited by adding FG-3019 (Fibrogen Inc.) at 10 μg/ml for 1 hour prior to treatment with TGFβ.

#### RNA isolation, Taqman low density array and qRT-PCR

Total RNA with intact small RNA fraction was isolated using a miRVana kit (Ambion, Austin, TX). Total RNA from mouse renal tissue was isolated with an RNeasy Mini kit (Qiagen, Hilden, Germany). Single strand cDNA was reverse transcribed using primer pools directed against 850 microRNAs, qRT-PCR was carried out in a Taqman low density array on a 7900HT Real-time PCR system (all from Applied Biosystems, Foster City, CA). Data was normalised using endogenous small nuclear RNAs (RNU42/44/48) with a cycle threshold (Ct) of <33 applied. Expression of TβRII mRNA, mouse TGFβ mRNA and miR-302d was determined by Taqman qRT-PCR (assays Hs00234253\_m1\*, Mm01178820\_m1 and 244178\_mat, respectively, normalised to 18S rRNA or RNU48, Applied Biosystems).

#### miRNA mimic/inhibitor, pCMV5B-TGFβ receptor II wt/K227R and FLCCN2

Pro-miR-302d (synthetic, MSY0000718) and Anti-miR-302d (inhibitory, MIN0000718) oligonucleotides, and scrambled control oligonucleotides were from Qiagen; sub-confluent cells were transfected with 40 nM of Pro-miR, Anti-miR or scrambled control using Fugene HD (Promega, Madison, WI) diluted in Opti-MEM I for 24 hours prior to serum restriction and stimulation. TβRII -type (pCMV5B-TGFβ receptor II wt, NO. 11766, Addgene, Cambridge, MA), TβRII K227R dominant negative (pCMV5B-TGFβ receptor II K227R, NO. 11762, Addgene) and full length CCN2 (FLCCN2, Fibrogen Inc.) were transfected into cells using Fugene HD for 24 hours. Empty vectors were transfected into control cells for all vectors used.

#### Luciferase assays

HEK-293T/HeLa cells were co-transfected with a TGFβR2 3'UTR luciferase containing construct (SwitchGear Genomics, Menlo Park, CA) with either Pro-miR or Anti-miR and normalised with Renilla luciferase. Cells were then serum restricted prior to treatment with rhCCN2 (25 ng/ml) for 24 hours. Luciferase activity was quantified with a dual-luciferase reporter kit (Promega).

#### HEK-Blue TGFβ SEAP assay

HEK-Blue TGFβ cells were transfected with FLCCN2 or Pro-miR for 24 hours (or empty vector/scrambled RNA controls) using Fugene HD. Cells were then serum restricted prior to treatment with TGFβ for 24 hours. SBE dependent SEAP activity was quantified with Quanti-Blue substrate (Invivogen) by absorbance at 620 nM.

#### Protein extraction, electrophoresis and western blotting

Total protein was isolated from cells and kidney sections in modified radio immunoprecipitation (RIPA) buffer (Tris-HCl, NaCl, EDTA, Na-deoxycholate, sodium dodecyl sulphate, supplemented with protease/phosphatase inhibitor cocktails (Sigma)). Normalised protein samples were run in 8–12% polyacrylamide SDS gels, transferred to polyvinylidene fluoride (Millipore, Watford, UK), and probed for TβRII (Abcam, Cambridge, UK), phospho-Akt/Akt, phospho-p38/p38, phospho-Smad2/Smad2, phospho-Smad3/Smad3, phospho-ERK/ERK, phospho-Smad1/5/8 (all from Cell Signalling Technologies, Beverly, MA), CCN2 (Santa Cruz Biotechnology, Santa Cruz, CA), fibronectin, thrombospondin, N-cadherin (all from BD Transduction, Lexington, KY), E-cadherin (Abcam), ZO-1 (Zymed, San Francisco, CA), smooth muscle actin, vimentin and β-actin (all from Sigma).

#### Immunofluorescence

Confluent HKC8 cells were transfected with Pro-miR or scrambled control for 24 hours and serum restricted before being treated with TGFβ for 24 hours. Cells were fixed with 3.7% paraformaldehyde (EMS, Fort Washington, PA), permeabilised with 0.1% Triton X-100 (Sigma) and blocked with 5% Goat Serum (Sigma). Cells were then stained for ZO-1 and Vimentin (Texas Red anti-rabbit/mouse IgG secondary, Invitrogen) and counterstained with Hoechst 33342 (Invitrogen). Images were acquired with an Axiovert 200M or Imager.M1 microscope and processed with Axiovision 4.0 (Carl Zeiss, Jena, Germany).

#### Mouse TGFβ ELISA

An ELISA for TGFβ in lysates from 10 day sham operated and UUO ligated mice was carried out with a DuoSet ELISA kit (R&D Systems) to the manufacturer's

instructions. A set of standards was created by diluting mouse TGFβ1 in serial twofold dilutions from 2000 pg/ml to 31.25 pg/ml. The absorbance values for the standards were used to generate a curve ( $R^2=0.9918$ ) and a linear regression was performed and used to determine the concentration of TGFβ in the individual samples.

#### Bioinformatic analysis

miRNA targets were determined using TargetScan 5.0 [http://www.targetscan.org (Lewis et al., 2003)] and miRNA target gene alignments were retrieved from microRNA.org [http://www.microRNA.org (Betel et al., 2008)]. Common physiological target pathways for miRNAs were determined with DIANA-mirPath [http://diana.cslab.ece.ntua.gr/pathways/ (Papadopoulos et al., 2009)].

#### Statistical analysis

Graphs are expressed as mean ± standard error. Densitometry was carried out with ImageJ software from the NIH. Statistical analysis of differences between groups was by one way ANOVA with post-hoc Tukey's test or Student's *t*-test, as appropriate. A *P*-value less than 0.05 was considered significant, analysis was carried out with GraphPad Prism software (GraphPad, San Diego, CA).

#### Funding

N.F. acknowledges an Irish Research Council studentship. Research was also supported by Science Foundation Ireland [grant numbers SFI/06/IN.1/B114 and SFI/RFP06/BIMF212 to S.P.C., H.O.D., F.M., C.G., D.B., J.C.].

Supplementary material available online at

<http://jcs.biologists.org/lookup/suppl/doi:10.1242/jcs.105528/-/DC1>

#### References

- Abreu, J. G., Ketpura, N. I., Reversade, B. and De Robertis, E. M. (2002). Connective-tissue growth factor (CTGF) modulates cell signalling by BMP and TGF-beta. *Nat. Cell Biol.* **4**, 599-604.
- Betel, D., Wilson, M., Gabow, A., Marks, D. S. and Sander, C. (2008). The microRNA.org resource: targets and expression. *Nucleic Acids Res.* **36**, D149-D153.
- Brigstock, D. R. (2010). Connective tissue growth factor (CCN2, CTGF) and organ fibrosis: lessons from transgenic animals. *J. Cell Commun. Signal.* **4**, 1-4.
- Burns, W. C., Twigg, S. M., Forbes, J. M., Pete, J., Tikellis, C., Thallas-Bonke, V., Thomas, M. C., Cooper, M. E. and Kantharidis, P. (2006). Connective tissue growth factor plays an important role in advanced glycation end product-induced tubular epithelial-to-mesenchymal transition: implications for diabetic renal disease. *J. Am. Soc. Nephrol.* **17**, 2484-2494.
- Chen, Y., Abraham, D. J., Shi-Wen, X., Pearson, J. D., Black, C. M., Lyons, K. M. and Leask, A. (2004). CCN2 (connective tissue growth factor) promotes fibroblast adhesion to fibronectin. *Mol. Biol. Cell* **15**, 5635-5646.
- Derynck, R. and Zhang, Y. E. (2003). Smad-dependent and Smad-independent pathways in TGF-beta family signalling. *Nature* **425**, 577-584.
- Ding, Z., Chen, Z., Chen, X., Cai, M., Guo, H., Chen, X. and Gong, N. (2011). Adenovirus-mediated anti-sense ERK2 gene therapy inhibits tubular epithelial-mesenchymal transition and ameliorates renal allograft fibrosis. *Transpl. Immunol.* **25**, 34-41.
- Douthwaite, J. A., Johnson, T. S., Haylor, J. L., Watson, P. and El Nahas, A. M. (1999). Effects of transforming growth factor-beta1 on renal extracellular matrix components and their regulating proteins. *J. Am. Soc. Nephrol.* **10**, 2109-2119.
- Eastham, A. M., Spencer, H., Soncin, F., Ritson, S., Merry, C. L., Stern, P. L. and Ward, C. M. (2007). Epithelial-mesenchymal transition events during human embryonic stem cell differentiation. *Cancer Res.* **67**, 11254-11262.
- Fragiadaki, M., Witherden, A. S., Kaneko, T., Sonnylal, S., Pusey, C. D., Bou-Gharios, G. and Mason, R. M. (2011). Interstitial fibrosis is associated with increased COL1A2 transcription in AA-injured renal tubular epithelial cells in vivo. *Matrix Biol.* **30**, 396-403.
- Fuchshofer, R., Ullmann, S., Zeilbeck, L. F., Baumann, M., Junglas, B. and Tamm, E. R. (2011). Connective tissue growth factor modulates podocyte actin cytoskeleton and extracellular matrix synthesis and is induced in podocytes upon injury. *Histochem. Cell Biol.* **136**, 301-319.
- Holbourn, K. P., Acharya, K. R. and Perbal, B. (2008). The CCN family of proteins: structure-function relationships. *Trends Biochem. Sci.* **33**, 461-473.
- Holm, T. M., Habashi, J. P., Doyle, J. J., Bedja, D., Chen, Y., van Erp, C., Lindsay, M. E., Kim, D., Schoenhoff, F., Cohn, R. D. et al. (2011). Noncanonical TGFβ signaling contributes to aortic aneurysm progression in Marfan syndrome mice. *Science* **332**, 358-361.
- Ito, Y., Goldschmeding, R., Kasuga, H., Claessen, N., Nakayama, M., Yuzawa, Y., Sawai, A., Matsuo, S., Weening, J. J. and Aten, J. (2010). Expression patterns of connective tissue growth factor and of TGF-beta isoforms during glomerular injury recapitulate glomerulogenesis. *Am. J. Physiol. Renal Physiol.* **299**, F545-F558.
- Iwano, M., Plieth, D., Danoff, T. M., Xue, C., Okada, H. and Neilson, E. G. (2002). Evidence that fibroblasts derive from epithelium during tissue fibrosis. *J. Clin. Invest.* **110**, 341-350.



- Kalluri, R. and Weinberg, R. A. (2009). The basics of epithelial-mesenchymal transition. *J. Clin. Invest.* **119**, 1420-1428.
- Kato, M., Zhang, J., Wang, M., Lanting, L., Yuan, H., Rossi, J. J. and Natarajan, R. (2007). MicroRNA-192 in diabetic kidney glomeruli and its function in TGF-beta-induced collagen expression via inhibition of E-box repressors. *Proc. Natl. Acad. Sci. USA* **104**, 3432-3437.
- Kriz, W., Kaissling, B. and Le Hir, M. (2011). Epithelial-mesenchymal transition (EMT) in kidney fibrosis: fact or fantasy? *J. Clin. Invest.* **121**, 468-474.
- Krützfeldt, J., Rajewsky, N., Braich, R., Rajeev, K. G., Tuschl, T., Manoharan, M. and Stoffel, M. (2005). Silencing of microRNAs in vivo with 'antagomirs'. *Nature* **438**, 685-689.
- Lan, H. Y. (2003). Tubular epithelial-myofibroblast transdifferentiation mechanisms in proximal tubule cells. *Curr. Opin. Nephrol. Hypertens.* **12**, 25-29.
- Lewis, B. P., Shih, I. H., Jones-Rhoades, M. W., Bartel, D. P. and Burge, C. B. (2003). Prediction of mammalian microRNA targets. *Cell* **115**, 787-798.
- Lin, S. L., Chang, D. C., Ying, S. Y., Leu, D. and Wu, D. T. (2010). MicroRNA miR-302 inhibits the tumorigenicity of human pluripotent stem cells by coordinate suppression of the CDK2 and CDK4/6 cell cycle pathways. *Cancer Res.* **70**, 9473-9482.
- Lipchina, I., Elkabetz, Y., Hafner, M., Sheridan, R., Mihailovic, A., Tuschl, T., Sander, C., Studer, L. and Betel, D. (2011). Genome-wide identification of microRNA targets in human ES cells reveals a role for miR-302 in modulating BMP response. *Genes Dev.* **25**, 2173-2186.
- Liu, N., Tolbert, E., Pang, M., Ponnusamy, M., Yan, H. and Zhuang, S. (2011). Suramin inhibits renal fibrosis in chronic kidney disease. *J. Am. Soc. Nephrol.* **22**, 1064-1075.
- Mackay, K., Striker, L. J., Stauffer, J. W., Doi, T., Agodoa, L. Y. and Striker, G. E. (1989). Transforming growth factor beta. Murine glomerular receptors and responses of isolate glomerular cells. *J. Clin. Invest.* **83**, 1160-1167.
- Massagué, J. and Chen, Y. G. (2000). Controlling TGF-beta signaling. *Genes Dev.* **14**, 627-644.
- Meng, X. M., Huang, X. R., Chung, A. C., Qin, W., Shao, X., Igarashi, P., Ju, W., Bottinger, E. P. and Lan, H. Y. (2010). Smad2 protects against TGF-beta/Smad3-mediated renal fibrosis. *J. Am. Soc. Nephrol.* **21**, 1477-1487.
- Meng, W., Xia, Q., Wu, L., Chen, S., He, X., Zhang, L., Gao, Q. and Zhou, H. (2011). Downregulation of TGF-beta receptor types II and III in oral squamous cell carcinoma and oral carcinoma-associated fibroblasts. *BMC Cancer* **11**, 88.
- Meng, X. M., Huang, X. R., Xiao, J., Chen, H. Y., Zhong, X., Chung, A. C. and Lan, H. Y. (2012). Diverse roles of TGF-beta receptor II in renal fibrosis and inflammation in vivo and in vitro. *J. Pathol.*
- Mori, T., Kawara, S., Shinozaki, M., Hayashi, N., Kakinuma, T., Igarashi, A., Takigawa, M., Nakanishi, T. and Takehara, K. (1999). Role and interaction of connective tissue growth factor with transforming growth factor-beta in persistent fibrosis: A mouse fibrosis model. *J. Cell. Physiol.* **181**, 153-159.
- Murray, M. J., Halsall, D. J., Hook, C. E., Williams, D. M., Nicholson, J. C. and Coleman, N. (2011). Identification of microRNAs From the miR-371~373 and miR-302 clusters as potential serum biomarkers of malignant germ cell tumors. *Am. J. Clin. Pathol.* **135**, 119-125.
- Nakerakanti, S. S., Bujor, A. M. and Trojanowska, M. (2011). CCN2 is required for the TGF-beta induced activation of Smad1-Erk1/2 signaling network. *PLoS ONE* **6**, e21911.
- Nguyen, T. Q., Roestenberg, P., van Nieuwenhoven, F. A., Bovenschen, N., Li, Z., Xu, L., Oliver, N., Aten, J., Joles, J. A., Vial, C. et al. (2008). CTGF inhibits BMP-7 signaling in diabetic nephropathy. *J. Am. Soc. Nephrol.* **19**, 2098-2107.
- O'Donovan, H. C., Hickey, F., Brazil, D. P., Kavanagh, D. H., Oliver, N., Martin, F., Godson, C. and Crean, J. (2012). Connective tissue growth factor antagonizes transforming growth factor-beta/Smad signalling in renal mesangial cells. *Biochem. J.* **441**, 499-510.
- Okada, H., Inoue, T., Kanno, Y., Kobayashi, T., Ban, S., Kalluri, R. and Suzuki, H. (2001). Renal fibroblast-like cells in Goodpasture syndrome rats. *Kidney Int.* **60**, 597-606.
- Pannu, J., Nakerakanti, S., Smith, E., ten Dijke, P. and Trojanowska, M. (2007). Transforming growth factor-beta receptor type I-dependent fibrogenic gene program is mediated via activation of Smad1 and ERK1/2 pathways. *J. Biol. Chem.* **282**, 10405-10413.
- Papadopoulos, G. L., Alexiou, P., Maragkakis, M., Reczko, M. and Hatzigeorgiou, A. G. (2009). DIANA-mirPath: Integrating human and mouse microRNAs in pathways. *Bioinformatics* **25**, 1991-1993.
- Phanish, M. K., Wahab, N. A., Colville-Nash, P., Hendry, B. M. and Dockrell, M. E. (2006). The differential role of Smad2 and Smad3 in the regulation of pro-fibrotic TGFbeta1 responses in human proximal-tubule epithelial cells. *Biochem. J.* **393**, 601-607.
- Rastaldi, M. P., Ferrario, F., Giardino, L., Dell'Antonio, G., Grillo, C., Grillo, P., Strutz, F., Müller, G. A., Colasanti, G. and D'Amico, G. (2002). Epithelial-mesenchymal transition of tubular epithelial cells in human renal biopsies. *Kidney Int.* **62**, 137-146.
- Riser, B. L., Denichilo, M., Cortes, P., Baker, C., Grondin, J. M., Yee, J. and Narins, R. G. (2000). Regulation of connective tissue growth factor activity in cultured rat mesangial cells and its expression in experimental diabetic glomerulosclerosis. *J. Am. Soc. Nephrol.* **11**, 25-38.
- Roberts, A. B., Tian, F., Byfield, S. D., Stuelten, C., Ooshima, A., Saika, S. and Flanders, K. C. (2006). Smad3 is key to TGF-beta-mediated epithelial-to-mesenchymal transition, fibrosis, tumor suppression and metastasis. *Cytokine Growth Factor Rev.* **17**, 19-27.
- Rosa, A., Spagnoli, F. M. and Brivanlou, A. H. (2009). The miR-430/427/302 family controls mesodermal fate specification via species-specific target selection. *Dev. Cell* **16**, 517-527.
- Rubio, D., Garcia, S., De la Cueva, T., Paz, M. F., Lloyd, A. C., Bernad, A. and Garcia-Castro, J. (2008). Human mesenchymal stem cell transformation is associated with a mesenchymal-epithelial transition. *Exp. Cell Res.* **314**, 691-698.
- Sato, M., Muragaki, Y., Saika, S., Roberts, A. B. and Ooshima, A. (2003). Targeted disruption of TGF-beta1/Smad3 signaling protects against renal tubulointerstitial fibrosis induced by unilateral ureteral obstruction. *J. Clin. Invest.* **112**, 1486-1494.
- Schmid, H., Boucherot, A., Yasuda, Y., Henger, A., Brunner, B., Eichinger, F., Nitsche, A., Kiss, E., Bleich, M., Gröne, H. J. et al. and for the European Renal cDNA Bank (ERCB) Consortium (2006). Modular activation of nuclear factor-kappaB transcriptional programs in human diabetic nephropathy. *Diabetes* **55**, 2993-3003.
- Sharma, K., Ziyadeh, F. N., Alzahabi, B., McGowan, T. A., Kapoor, S., Kurnik, B. R. C., Kurnik, P. B. and Weisberg, L. S. (1997). Increased renal production of transforming growth factor-beta1 in patients with type II diabetes. *Diabetes* **46**, 854-859.
- Shi-wen, X., Stanton, L. A., Kennedy, L., Pala, D., Chen, Y., Howat, S. L., Renzoni, E. A., Carter, D. E., Bou-Gharios, G., Stratton, R. J. et al. (2006). CCN2 is necessary for adhesive responses to transforming growth factor-beta1 in embryonic fibroblasts. *J. Biol. Chem.* **281**, 10715-10726.
- Shi-Wen, X., Leask, A. and Abraham, D. (2008). Regulation and function of connective tissue growth factor/CCN2 in tissue repair, scarring and fibrosis. *Cytokine Growth Factor Rev.* **19**, 133-144.
- Subramanyam, D., Lamouille, S., Judson, R. L., Liu, J. Y., Bucay, N., Derynck, R. and Blalock, R. (2011). Multiple targets of miR-302 and miR-372 promote reprogramming of human fibroblasts to induced pluripotent stem cells. *Nat. Biotechnol.* **29**, 443-448.
- Sutaria, P. M., Ohebshalom, M., McCaffrey, T. A., Vaughan, E. D., Jr and Felsen, D. (1998). Transforming growth factor-beta receptor types I and II are expressed in renal tubules and are increased after chronic unilateral ureteral obstruction. *Life Sci.* **62**, 1965-1972.
- Truty, M. J., Lomber, G., Fernandez-Zapico, M. E. and Urrutia, R. (2009). Silencing of the transforming growth factor-beta (TGFbeta) receptor II by Kruppel-like factor 14 underscores the importance of a negative feedback mechanism in TGFbeta signaling. *J. Biol. Chem.* **284**, 6291-6300.
- Wahab, N. A., Yevdokimova, N., Weston, B. S., Roberts, T., Li, X. J., Brinkman, H. and Mason, R. M. (2001). Role of connective tissue growth factor in the pathogenesis of diabetic nephropathy. *Biochem. J.* **359**, 77-87.
- Wang, Q., Wang, Y., Minto, A. W., Wang, J., Shi, Q., Li, X. and Quigg, R. J. (2008). MicroRNA-377 is upregulated and can lead to increased fibronectin production in diabetic nephropathy. *FASEB J.* **22**, 4126-4135.
- Wang, Q., Usinger, W., Nichols, B., Gray, J., Xu, L., Seeley, T. W., Brenner, M., Guo, G., Zhang, W., Oliver, N. et al. (2011). Cooperative interaction of CTGF and TGF-beta in animal models of fibrotic disease. *Fibrogenesis Tissue Repair* **4**, 4.
- Wu, L. and Derynck, R. (2009). Essential role of TGF-beta signaling in glucose-induced cell hypertrophy. *Dev. Cell* **17**, 35-48.
- Yang, J. and Liu, Y. (2001). Dissection of key events in tubular epithelial to myofibroblast transition and its implications in renal interstitial fibrosis. *Am. J. Pathol.* **159**, 1465-1475.
- Yang, F., Huang, X. R., Chung, A. C., Hou, C. C., Lai, K. N. and Lan, H. Y. (2010). Essential role for Smad3 in angiotensin II-induced tubular epithelial-mesenchymal transition. *J. Pathol.* **221**, 390-401.
- Zeisberg, M. and Duffield, J. S. (2010). Resolved: EMT produces fibroblasts in the kidney. *J. Am. Soc. Nephrol.* **21**, 1247-1253.
- Zeisberg, M. and Neilson, E. G. (2010). Mechanisms of tubulointerstitial fibrosis. *J. Am. Soc. Nephrol.* **21**, 1819-1834.
- Ziyadeh, F. N. (2004). Mediators of diabetic renal disease: the case for tgf-Beta as the major mediator. *J. Am. Soc. Nephrol.* **15**, S55-S57.
